# Supplementary material for: When Is the Brain Dead? Living-Like Electrophysiological Responses and Photon Emissions from Applications of Neurotransmitters in Fixed Post-Mortem Human Brains
Source: PLoS One. 2016 Dec 1;11(12):e0167231. doi: 10.1371/journal.pone.0167231 (PMC5131983; doi:10.1371/journal.pone.0167231)
Supplement: S1 File — This file contains data used in the analysis involving post-mortem tissue exposed to injections of nicotine. (XLSX) [file pone.0167231.s001.xlsx]

## Sheet: Sheet1
time	brain	structure	hemisphere	compound	concentration	delta	theta	alpha	beta1	beta2	gamma	global
0	0	1	0	0	7	810.7	93	36	11.3	5.7	1.8	159.75
1	0	1	0	0	10	465.7	126.6	34.3	7.9	4.6	1.2	106.72
2	0	1	0	0	9	805.5	115.6	51.5	12.8	5.6	2.2	165.53
3	0	1	0	0	0	808.8	84.7	30.9	11.1	3.8	1.3	156.77
4	0	1	0	0	8	491.6	95.1	21.9	4.9	4.1	1.4	103.17
5	1	1	0	0	9	487.1	123.1	40.5	7.4	4.2	1.3	110.6
6	1	1	0	0	7	371.5	69.3	37.7	6.4	4.7	1.2	81.8
7	1	1	0	0	8	400.9	91.5	33	8.5	4.6	1.4	89.98
8	1	1	0	0	0	210.6	100	23.1	6.6	6.1	1.5	57.98
9	1	1	0	0	10	459.4	111.8	39.6	4.9	3.8	1.5	103.5
10	2	1	0	0	9	628.9	104.2	38	8.3	5.2	1.3	130.98
11	2	1	0	0	7	298.2	86.9	21.4	9.5	3.8	1.2	70.17
12	2	1	0	0	10	520	82.9	26.9	7.1	4.3	1.4	107.1
13	2	1	0	0	8	504.5	110.6	33.3	8.1	4.6	1.7	110.47
14	2	1	0	0	0	294.5	103.8	28.5	5	4.5	1.5	72.97
15	0	1	1	0	8	413.8	75.9	46.4	7.1	3.9	1.4	91.42
16	0	1	1	0	9	615.1	102.6	29.4	9.6	5.6	1.8	127.35
17	0	1	1	0	0	520.2	103.3	30.7	6.9	4.1	1.5	111.12
18	0	1	1	0	7	417.5	138.6	34.2	7.7	4.8	1.7	100.75
19	0	1	1	0	10	727.3	80.3	35.1	9.4	4.4	1.6	143.02
20	1	1	1	0	0	536.1	122	33.4	7.3	5.1	1.4	117.55
21	1	1	1	0	7	558.5	81.9	17	8.7	6.2	1.5	112.3
22	1	1	1	0	8	986	119	33	7	4	2	191.83
23	1	1	1	0	9	306.9	65.5	25.6	7.3	4	1.4	68.45
24	1	1	1	0	10	473.3	110.2	26.8	7.4	4.7	1.3	103.95
25	2	1	1	0	7	477	112	27.6	5.9	4.1	1.4	104.67
26	2	1	1	0	9	494.3	86.7	29.8	9.2	3.8	1.6	104.23
27	2	1	1	0	10	371.4	136.6	31.9	8.2	4.2	1.4	92.28
28	2	1	1	0	8	507	82.1	37.4	6.6	4.7	1.4	106.53
29	2	1	1	0	0	414.6	87.2	34.2	6.8	4.5	1.3	91.43
30	0	0	0	0	10	612	101.3	32.7	7.5	7.2	1.9	127.1
31	0	0	0	0	0	369.2	65.4	34.4	7.7	4	2	80.45
32	0	0	0	0	9	475.9	85	33.1	7.2	4.1	1.5	101.13
33	0	0	0	0	8	452.9	70	33.3	6.4	4	1.4	94.67
34	0	0	0	0	7	416.9	72	24.2	6.3	5	1.4	87.63
35	1	0	0	0	10	493.7	95.4	29.3	7.7	3.5	1.6	105.2
36	1	0	0	0	0	361.2	100.8	30.5	7.7	3.8	1.3	84.22
37	1	0	0	0	9	420.8	89.4	25.3	5.8	4.1	1.4	91.13
38	1	0	0	0	7	516	109.9	31.8	7.7	4.6	1.4	111.9
39	1	0	0	0	8	358.5	79.1	33.1	5.7	4.3	1.4	80.35
40	2	0	0	0	0	315.2	103.1	33.1	6.2	4.2	1.3	77.18
41	2	0	0	0	10	439.4	103.7	30.4	8.5	4.3	1.5	97.97
42	2	0	0	0	7	284.5	101.9	20.6	8.4	3.5	1.4	70.05
43	2	0	0	0	9	295.6	89.5	26.9	7.7	3.6	1.4	70.78
44	2	0	0	0	8	372.2	74.1	29.1	6.5	3.5	1.6	81.17
45	0	0	1	0	9	301.3	97.6	33.1	6.6	3.8	1.6	74
46	0	0	1	0	0	418.7	66.2	20.1	7.1	3.6	2	86.28
47	0	0	1	0	10	389.4	123.7	32.8	7.9	3.7	1.6	93.18
48	0	0	1	0	8	556	93.4	32.8	7.3	4.7	1.1	115.88
49	0	0	1	0	7	479.6	96.1	30.5	6.8	4.9	1.4	103.22
50	1	0	1	0	10	403.4	127.4	25.5	7.1	3.9	1.8	94.85
51	1	0	1	0	0	366.2	57.5	28	5.2	3.7	2.5	77.18
52	1	0	1	0	9	517.9	115.2	40.5	11.3	5.4	1.6	115.32
53	1	0	1	0	8	400.6	112.5	38.3	7.3	4.2	1.6	94.08
54	1	0	1	0	7	343.6	78.2	35.2	9.1	6.4	1.6	79.02
55	2	0	1	0	10	352.6	146.3	36.8	5.6	4.4	1.6	91.22
56	2	0	1	0	8	385.6	125.1	22.2	9.2	3.8	1.4	91.22
57	2	0	1	0	9	1046	117	41	6	4	2	202.67
58	2	0	1	0	7	267	75.4	30	5.8	5	1.4	64.1
59	2	0	1	0	0	331.6	54.6	29.4	6.3	4	1.6	71.25
60	0	0	0	0	6	423.6	87.1	31.9	6.3	3.6	1.6	92.35
61	0	0	0	0	4	489	88.9	24.5	7.2	4.5	1.3	102.57
62	0	0	0	0	5	396.2	84.2	25.1	6.7	3.8	1.3	86.22
63	1	0	0	0	6	458.6	75.6	37	6.8	5.2	1.5	97.45
64	1	0	0	0	4	432.6	111.4	44.1	6.4	4	1.4	99.98
65	1	0	0	0	5	509.9	107.2	32.7	7.1	9.3	1.8	111.33
66	2	0	0	0	5	351.6	94.9	37.7	8.4	5.5	2.3	83.4
67	2	0	0	0	6	364.9	81.3	28	6.5	4.4	1.6	81.12
68	2	0	0	0	4	404	67.1	28.9	10.9	5	1.9	86.3
69	0	1	0	0	6	342.4	134.4	38.1	6.9	5	1.8	88.1
70	0	1	0	0	4	473.2	82.3	36.9	6.9	4.4	1.4	100.85
71	0	1	0	0	5	365.5	123.7	31.7	5.3	3.8	1.2	88.53
72	1	1	0	0	5	494.5	109.9	31.9	6.7	4.5	1.8	108.22
73	1	1	0	0	6	403.2	56.5	37.3	6.9	4.7	1.7	85.05
74	1	1	0	0	4	334.6	80.8	34.7	7.5	4.3	1.2	77.18
75	2	1	0	0	5	610.9	150.9	36.2	6.3	6.9	1.8	135.5
76	2	1	0	0	6	447.8	102.1	38.2	9.6	4.6	1.4	100.62
77	2	1	0	0	4	372.9	97.7	27.4	7.5	4.9	1.7	85.35
78	0	0	1	0	6	495.6	65.4	33.6	6.4	4.7	1.6	101.22
79	0	0	1	0	5	316.8	75.9	27.7	5.2	3.4	1.3	71.72
80	0	0	1	0	4	302.7	89.8	35.2	7.3	3.4	1.3	73.28
81	1	0	1	0	5	428.7	81.5	29.6	6.5	5	1.6	92.15
82	1	0	1	0	4	423.2	126.8	26.9	4.9	4.8	1.5	98.02
83	1	0	1	0	6	457.8	81.7	29.2	6.6	4.3	1.6	96.87
84	2	0	1	0	4	322	91.7	36.5	6.7	4.3	1.6	77.13
85	2	0	1	0	6	513	90.5	27.7	6.6	4	1.4	107.2
86	2	0	1	0	5	288.3	81.7	32.8	7.3	4	1.5	69.27
87	0	1	1	0	5	487.2	102	28.3	7.6	4.7	1.5	105.22
88	0	1	1	0	6	368.2	81.2	40.5	6.7	3.3	1.5	83.57
89	0	1	1	0	4	173.6	69.2	28.1	5.6	3.2	1.4	46.85
90	1	1	1	0	6	427.6	82.2	42.2	7.3	4.8	1.7	94.3
91	1	1	1	0	4	388	118.7	33.2	8.3	4.1	1.8	92.35
92	1	1	1	0	5	520.8	116.6	30.4	8.5	4.9	1.6	113.8
93	2	1	1	0	6	494.5	84.7	35.8	6.6	4.2	1.8	104.6
94	2	1	1	0	5	460.9	87.8	25.7	8.8	4.4	1.5	98.18
95	2	1	1	0	4	384.8	75	30.7	6	4.6	1.6	83.78
96	0	0	0	0	1	180.9	197.7	55.8	11.6	7.2	1.1	75.72
97	0	0	0	0	2	450.6	82.9	31.6	8.5	4.4	1.7	96.62
98	0	0	0	0	3	578.2	95.6	24.4	11.2	4.8	1.5	119.28
99	1	0	0	0	2	360.2	71.7	35.5	10.8	5.7	1.3	80.87
100	1	0	0	0	1	447.2	94.8	33.3	7	5.5	1.6	98.23
101	1	0	0	0	3	354.6	103.7	38.8	8.3	4.5	1.4	85.22
102	2	0	0	0	3	296.9	87.3	33.4	6.8	4.4	1.3	71.68
103	2	0	0	0	2	372	102	35.6	7.9	5.1	1.4	87.33
104	2	0	0	0	1	459.5	144.5	33.9	11.3	5.8	1.8	109.47
105	0	1	0	0	3	454.5	84.4	31.2	7.8	4.6	1.6	97.35
106	0	1	0	0	1	687	133.4	24.1	6.6	4.2	1.6	142.82
107	0	1	0	0	2	554.1	98.2	23.2	6.5	4.9	2	114.82
108	1	1	0	0	1	487.5	88.2	31.8	8.3	4.5	1.7	103.67
109	1	1	0	0	3	609	77	22.6	7.7	6	1.6	120.65
110	1	1	0	0	2	680.1		55.8	17.3	15.3	7.6
111	2	1	0	0	3	339.5	89.1	26.1	5.7	5.5	1.4	77.88
112	2	1	0	0	2	377.5	105.3	32.9	7	4.6	1.7	88.17
113	2	1	0	0	1	473.9	77.6	37.3	7.5	4.6	1.5	100.4
114	0	0	1	0	1	321.4	97.5	32	6.8	4.8	1.5	77.33
115	0	0	1	0	3	779.2	82.1	38.1	9.9	5.7	1.8	152.8
116	0	0	1	0	2	438.9	132.2	35.5	9.9	5	2	103.92
117	1	0	1	0	3	452.8	84.4	43.1	7.1	4.9	1.8	99.02
118	1	0	1	0	1	343.3	88.6	46.7	7.2	4.8	1.6	82.03
119	1	0	1	0	2	398.6	109.3	27.4	8.9	4.4	1.7	91.72
120	2	0	1	0	2	390.6	119.1	30.5	9.1	4.1	1.6	92.5
121	2	0	1	0	1	286.9	54.2	25.3	7.1	5.4	1.1	63.33
122	2	0	1	0	3	520.2	65.8	37.3	4.6	6.6	1.6	106.02
123	0	1	1	0	3	358.2	136	37.2	8.6	4.4	1.9	91.05
124	0	1	1	0	2	457.3	81	36.4	7.2	5.8	1.8	98.25
125	0	1	1	0	1	534.3	104.8	31.8	7.7	5.1	1.7	114.23
126	1	1	1	0	2	648.8	106.5	48.1	9.7	5.4	3.1	136.93
127	1	1	1	0	1	372.5	99.7	30	7.6	5.7	2.3	86.3
128	1	1	1	0	3	355.3	115.8	43.8	11.9	5.6	2.2	89.1
129	2	1	1	0	2	559.3	31.3	33.2	4.6	3.3	1.5	105.53
130	2	1	1	0	3	453.1	92.2	31.5	8.5	4.3	1.3	98.48
131	2	1	1	0	1	736.2	118.2	40.3	8	3.8	1.5	151.33
