# Supplementary material for: When Is the Brain Dead? Living-Like Electrophysiological Responses and Photon Emissions from Applications of Neurotransmitters in Fixed Post-Mortem Human Brains
Source: PLoS One. 2016 Dec 1;11(12):e0167231. doi: 10.1371/journal.pone.0167231 (PMC5131983; doi:10.1371/journal.pone.0167231)
Supplement: S2 File — This file contains data used in the analysis involving post-mortem tissue exposed to injections of 5-HTP. (XLSX) [file pone.0167231.s002.xlsx]

## Sheet: Sheet1
concentration	hemisphere	structure	delta	theta	alpha	beta1	beta2	gamma	global
0	0	0	471.3	82.4	25.5	5	3.6	1.3	98.18
1	0	0	582.8	67.3	20.7	3	3.5	1	113.05
2	0	0	185	59.9	20.2	5.9	3.6	1	45.93
3	0	0	330.7	60	21.4	5.7	2.8	1.2	70.3
4	0	0	212.1	83.5	20.5	5.1	3	1.1	54.22
5	0	0	178.8	63.5	34.4	7.5	3.8	1.1	48.18
6	0	0	249.6	83.7	18.7	7.5	3.6	2.1	60.87
7	0	0	141.4	72.2	25.3	6.9	4	2	41.97
8	0	0	119.1	63.8	34.6	7.5	2.7	1.1	38.13
0	0	0	415.2	61.2	22.1	5.7	4.3	1.2	84.95
1	0	0	285.8	55.1	26.7	7.7	3.8	1.5	63.43
2	0	0	414.7	78	26.5	5.8	3.1	1.5	88.27
3	0	0	505.4	34.8	18.2	8.1	3.9	1.1	95.25
4	0	0	210.6	89.6	26.1	5.3	2.7	1.2	55.92
5	0	0	307.2	59.8	22.2	6.7	4	1.5	66.9
6	0	0	274.8	57.8	23	4	2.8	1.3	60.62
7	0	0	365	68.4	29.3	6.7	3	1.1	78.92
8	0	0	306.6	68.3	23.2	4.3	4.3	1.5	68.03
0	0	0	356.7	45.4	24.5	6.5	2.6	1.5	72.87
1	0	0	452.9	47.1	25.5	4.6	4.3	1.6	89.33
2	0	0	379.5	73.9	26.3	6.4	3.8	1.5	81.9
3	0	0	309.4	56.1	31	6.1	3.6	1	67.87
4	0	0	180.2	64.9	24	6.8	2.6	1.3	46.63
5	0	0	387.3	37.7	29	5.7	4.6	1.3	77.6
6	0	0	472.7	37.1	23.4	7.3	3.5	1.2	90.87
7	0	0	433.4	74.8	15	5.3	3.3	0.9	88.78
8	0	0	248.2	69.1	15.1	5.9	4.2	1.6	57.35
0	1	0	283.8	55.8	20.4	5.9	3.8	0.9	61.77
1	1	0	553.8	20.6	23.5	4.2	2.8	1.8	101.12
2	1	0	348.8	84.3	23.8	4.9	3.7	1.5	77.83
3	1	0	270	93.1	26.3	4.6	3.1	1.3	66.4
4	1	0	230.8	55.3	27.4	4.4	3.1	1.5	53.75
5	1	0	171.4	56.8	38	4.2	5.6	2.2	46.37
6	1	0	236	78	15.3	3.9	2.7	1.7	56.27
7	1	0	220.2	67.8	25.5	6.3	3.7	1.3	54.13
8	1	0	251.5	52.1	22.7	6.7	4.4	1.2	56.43
0	1	0	344.7	63.1	22.6	4.2	2.9	1.6	73.18
1	1	0	360.5	62	30.6	4	3.8	1.7	77.1
2	1	0	334.9	76.9	25.2	7.2	4.5	1.3	75
3	1	0	586.6	71.5	29.1	6.1	4.1	1.2	116.43
4	1	0	262.1	45.4	33.8	5.7	2.3	1.1	58.4
5	1	0	360.4	45.1	18.6	7.6	4.4	1.2	72.88
6	1	0	347.9	76.8	24.4	3.6	4	1.5	76.37
7	1	0	393	72	23.3	6.1	4.3	1.3	83.33
8	1	0	357.8	92.5	27.8	4.6	3.1	1.2	81.17
0	1	0	207.4	96	13.4	4.1	3.8	1.1	54.3
1	1	0	279.5	44.4	26.1	6.1	3.1	1.3	60.08
2	1	0	518.8	75.4	23.8	5.5	4	1.2	104.78
3	1	0	229.1	61.8	30.1	6.3	3.7	1.2	55.37
4	1	0	422.6	55.1	12.1	3.4	2.9	1.6	82.95
5	1	0	370.7	77.5	20.6	6	3.4	1.2	79.9
6	1	0	49.52	53.74	18.13	9.81	4.51	1.54	22.87
7	1	0	307.3	51.5	21.8	5.7	3	1.3	65.1
8	1	0	450.8	77.5	28.2	4.9	3.5	1.3	94.37
0	0	1	376.2	96.6	35	5.5	4.2	2	86.58
1	0	1	333.1	66.4	20.4	6.3	3.9	1.3	71.9
2	0	1	387.8	79.6	21.9	7.9	3.1	1.2	83.58
3	0	1	216.4	54.3	30.7	7.4	4.1	1.4	52.38
4	0	1	391.9	54.8	24.1	6.5	3.4	1.3	80.33
5	0	1	304.1	70.4	15.4	4.9	2.9	1.3	66.5
6	0	1	473	103.6	29.9	4	2.2	1.7	102.4
7	0	1	281.8	63.4	23.2	4.8	3.5	1.3	63
8	0	1	242.1	138.2	25.7	6.2	4.2	1.5	69.65
0	0	1	336.7	51.4	14.6	5.1	5.8	1.7	69.22
1	0	1	383.9	69	17.5	6.4	3.1	1.1	80.17
2	0	1	268.7	62.7	23.1	5.7	4	1.2	60.9
3	0	1	299.2	58.3	27.4	5.3	3.7	1.4	65.88
4	0	1	347.6	74.2	23.6	7.8	5.1	1.7	76.67
5	0	1	142.1	31.2	22.7	4.6	3.2	1	34.13
6	0	1	396.4	49.5	22	7.2	4.4	1.4	80.15
7	0	1	281.9	55.4	19.4	4.7	2.7	0.6	60.78
8	0	1	397.8	46	44.2	5.2	3.4	1.1	82.95
0	0	1	367	85.6	26.7	5.3	3	1.5	81.52
1	0	1	230.4	38.4	28.2	5.6	3.3	1.4	51.22
2	0	1	280	70.6	16.6	5.9	3.9	1	63
3	0	1	407.5	68.5	25.6	6.6	4.3	1.4	85.65
4	0	1	306.7	78.9	24.5	3.4	2.5	1.2	69.53
5	0	1	376.2	45.4	33.5	7.6	3.2	1.4	77.88
6	0	1	252.2	98.7	30.4	6.4	4.3	1.1	65.52
7	0	1	242	62.2	37.1	7	3.4	1.7	58.9
8	0	1	316.7	72.5	26.2	6.3	3.4	1.3	71.07
0	1	1	528.4	61.2	28	2.9	4.5	1.3	104.38
1	1	1	123.5	44.3	18.2	6.7	4	1.4	33.02
2	1	1	344.4	94.6	20.9	5	4	1.4	78.38
3	1	1	230.7	75.3	26.6	6.7	3.7	1.2	57.37
4	1	1	227.1	94	19.3	6.2	3.8	1.1	58.58
5	1	1	298.8	84.5	29.1	5.4	3.8	1.3	70.48
6	1	1	207.9	54.9	26.3	5.2	4.5	1.2	50
7	1	1	209.1	59	26.8	6.6	3.5	1.4	51.07
8	1	1	472.1	47	20.9	2.7	4.3	1.1	91.35
0	1	1	321.6	63.3	17.8	7.5	3.4	1.5	69.18
1	1	1	277.7	57.5	26.3	6.4	3.6	1.4	62.15
2	1	1	525.7	88.6	25.9	6.4	4.3	1.3	108.7
3	1	1	341.6	46.6	23.1	4.9	4.5	0.9	70.27
4	1	1	177.9	49.5	26.7	5	3.8	1.7	44.1
5	1	1	260.8	100.4	31.1	5.1	3.5	1.5	67.07
6	1	1	380.8	42.2	23	6.5	4.1	1.3	76.32
7	1	1	565.4	50	12.7	4.5	2.9	1.4	106.15
8	1	1	399.5	42.2	42.6	5.2	3.1	1.5	82.35
0	1	1	321.6	110.5	33.1	3.5	3.4	1.6	78.95
1	1	1	361.1	71.1	22.6	5.4	3.1	1.2	77.42
2	1	1	432	61.4	29.3	7.4	4.7	2.4	89.53
3	1	1	219.9	51.5	22.5	6.9	3.1	1.2	50.85
4	1	1	297.1	67.9	24.5	7.4	4.1	1.5	67.08
5	1	1	266.9	63.1	20.4	6.1	3.9	1.5	60.32
6	1	1	561.4	78.8	23.9	5.2	3.3	1.5	112.35
7	1	1	291.2	68.7	21.3	6.6	3.7	1.3	65.47
8	1	1	251	29.2	18.7	5.5	3	1.4	51.47
