# Supplementary material for: When Is the Brain Dead? Living-Like Electrophysiological Responses and Photon Emissions from Applications of Neurotransmitters in Fixed Post-Mortem Human Brains
Source: PLoS One. 2016 Dec 1;11(12):e0167231. doi: 10.1371/journal.pone.0167231 (PMC5131983; doi:10.1371/journal.pone.0167231)
Supplement: S5 File — This file contains data used in the analysis involving post-mortem tissue exposed to injections of glutamate with ketamine. (XLSX) [file pone.0167231.s005.xlsx]

## Sheet: Sheet1
concentration	delta	theta	alpha	beta1	beta2	gamma	global
0	220.4	66.3	23.1	5.8	3.8	1.2	53.43
1	285.5	75.8	19.9	5.3	4	1.5	65.33
2	553.2	67.6	16.1	4	3.7	0.9	107.58
0	178	48	18.8	3.1	2.7	1.4	42
1	100.7	100.3	19.1	5.5	3.2	1.1	38.32
2	378.5	65	19.2	4.8	3.4	1.2	78.68
0	304.1	72.7	22.1	6.1	4	1.3	68.38
1	262.3	37.5	26.4	5.5	4	1.2	56.15
2	452.1	56.1	29	5.4	3.6	1.2	91.23
