# Supplementary material for: When Is the Brain Dead? Living-Like Electrophysiological Responses and Photon Emissions from Applications of Neurotransmitters in Fixed Post-Mortem Human Brains
Source: PLoS One. 2016 Dec 1;11(12):e0167231. doi: 10.1371/journal.pone.0167231 (PMC5131983; doi:10.1371/journal.pone.0167231)
Supplement: S6 File — This file contains data used in the analysis involving photon counts paired to injections of glutamate. (XLSX) [file pone.0167231.s006.xlsx]

## Sheet: Sheet1
case	hem	drug	time	photo_d	photo_t	photo_a	photo_b1	photo_b2	photo_g
0	0	0	0	0	-0.2	0.2	0.45	0.3	0.2
1	0	0	1	-0.5	-0.3	-0.5	0.4	-0.6	0.41
2	0	1	0	-0.2	0.9	-0.1	0	-0.95	-0.15
3	0	1	1	0.1	0.6	-0.2	-0.3	0.3	0.67
4	1	0	0	0	-0.3	0.7	0.1	0.3	0.72
5	1	0	1	0.6	-0.3	0.1	-0.3	-0.6	-0.4
6	1	1	0	-0.8	-0.3	-0.1	0.21	-0.62	0.05
7	1	1	1	1	0.8	0.4	0.6	-0.9	0.46
8	0	0	0	0.7	0	0.5	0.3	0.1	-0.72
9	0	0	1	-0.3	-0.3	-1	-0.3	-0.56	-0.67
10	0	1	0	-0.1	-0.7	-0.2	0.05	-0.4	0
11	0	1	1	0.2	0.7	0.9	0.3	-0.1	0.2
12	1	0	0	-0.8	0.1	-0.8	0.1	-0.1	0.05
13	1	0	1	0.9	0.6	-0.9	0.6	-0.56	-0.82
14	1	1	0	-1	-0.36	0.2	-0.3	0.2	-0.21
15	1	1	1	-1	0.1	0.9	0.5	-0.98	0.87
16	0	0	0	-0.9	-0.3	0.1	-0.98	0.05	0.46
17	0	0	1	0.1	-0.6	-0.2	0.2	-0.41	0.21
18	0	1	0	-0.3	-0.2	-0.62	-0.3	-0.3	-0.3
19	0	1	1	-0.3	0	0.7	0.3	0.9	0.7
20	1	0	0	-0.2	-0.3	0.3	0.21	-0.3	-0.21
21	1	0	1	0.9	0.1	0.9	0.5	0.7	0.6
22	1	1	0	-0.9	0.2	-0.7	0.1	0.6	0.63
23	1	1	1	-0.1	0.1	-0.1	0.21	-0.21	0.46
24	0	0	0	0.6	0.6	-0.1	0.5	-0.6	0
25	0	0	1	0.3	-0.7	0.7	0.3	-0.21	0.1
26	0	1	0	0.7	-0.6	-0.9	-0.7	-0.1	-0.3
27	0	1	1	-0.7	-1	-0.1	0.6	0.1	0.6
28	1	0	0	-0.2	-0.6	-0.5	0.1	-0.4	-0.21
29	1	0	1	0.9	0.9	0.7	0.5	0.4	0.3
30	1	1	0	0.7	-0.4	1	0.9	-0.45	-0.62
31	1	1	1	-0.46	0.46	-0.05	0.15	-0.3	-0.15

## Sheet: Sheet2
case
hem
drug
time
photo_d
photo_t
photo_a
photo_b1
photo_b2
photo_g
