# Supplementary material for: When Is the Brain Dead? Living-Like Electrophysiological Responses and Photon Emissions from Applications of Neurotransmitters in Fixed Post-Mortem Human Brains
Source: PLoS One. 2016 Dec 1;11(12):e0167231. doi: 10.1371/journal.pone.0167231 (PMC5131983; doi:10.1371/journal.pone.0167231)
Supplement: S7 File — This file contains data used in the analysis involving post-mortem tissue exposed to electrical stimuli directed to the transverse temporal gyri. (XLSX) [file pone.0167231.s007.xlsx]

## Sheet: Sheet1
code	broadfreq	freq	hemisphere	position	signal	delta	theta	alpha	beta1	beta2	gamma	global	lowfreq	highfreq
HE1		0	0	1	0	192.8	58.9	27.2	7.5	4	1.5	48.65	92.97	4.33
HE1	1	1	0	1	0	352.8	91.5	31.4	7.6	35.1	1.6	86.67	158.57	14.77
HE1	1	2	0	1	0	321.8	79.6	24.5	6.3	3.9	1.3	72.9	141.97	3.83
HE1	1	3	0	1	0	300.4	89.7	32.4	8	3.4	1.4	72.55	140.83	4.27
HE1	1	4	0	1	0	224.5	69.1	31.7	5.1	3.9	1.2	55.92	108.43	3.4
HE1	1	5	0	1	0	427.1	113	28.3	8.1	4.6	1.3	97.07	189.47	4.67
HE1	2	6	0	1	0	694.3	69.6	22.8	7.2	3.6	1.2	133.12	262.23	4
HE1	2	7	0	1	0	421.7	83.9	29.5	8.1	3.8	1.3	91.38	178.37	4.4
HE1	2	8	0	1	0	385.2	88.6	26.2	6.1	3.4	1.2	85.12	166.67	3.57
HE1	2	9	0	1	0	345.8	65.4	31.2	6.2	4	1.5	75.68	147.47	3.9
HE1	2	10	0	1	0	335.8	84	27.4	4.9	4.6	1.3	76.33	149.07	3.6
HE2		0	0	0	0	484.2	104.9	16.5	4.4	4.3	1.4	102.62	201.87	3.37
HE2	1	1	0	0	0	638.3	100.9	34.2	6.8	23.5	1.3	134.17	257.8	10.53
HE2	1	2	0	0	0	316.5	66.6	27.7	6.1	5.6	1.4	70.65	136.93	4.37
HE2	1	3	0	0	0	547.1	109.3	31.9	5.6	2.5	1.4	116.3	229.43	3.17
HE2	1	4	0	0	0	462.8	89.4	27.5	5.3	3.9	1.3	98.37	193.23	3.5
HE2	1	5	0	0	0	391.8	54.2	24	5.3	3.7	1.4	80.07	156.67	3.47
HE2	2	6	0	0	0	331.6	61.6	25.7	7.1	5.3	1.4	72.12	139.63	4.6
HE2	2	7	0	0	0	413	76.3	28.5	4.6	3.5	1.3	87.87	172.6	3.13
HE2	2	8	0	0	0	302.4	69.9	24.8	5.7	3.8	1.6	68.03	132.37	3.7
HE2	2	9	0	0	0	384.9	75.5	19.1	6.3	3.8	1.2	81.8	159.83	3.77
HE2	2	10	0	0	0	396.3	81.4	37.9	5	3.8	1.4	87.63	171.87	3.4
HE3		0	0	0	1	391.6	68.1	35.6	9.2	4	1.5	85	165.1	4.9
HE3	1	1	0	0	1	431	79.7	26.6	7.1	5.4	1.7	91.92	179.1	4.73
HE3	1	2	0	0	1	486.6	84	25.9	6.2	3.6	1.6	101.32	198.83	3.8
HE3	1	3	0	0	1	344.6	58.1	22.1	6.4	3.6	1.4	72.7	141.6	3.8
HE3	1	4	0	0	1	343.2	75.4	20.6	7.9	2.5	1.2	75.13	146.4	3.87
HE3	1	5	0	0	1	339.9	60.8	22.1	6.8	3.5	1.4	72.42	140.93	3.9
HE3	2	6	0	0	1	510.3	57.7	24.3	6.2	3.3	1.4	100.53	197.43	3.63
HE3	2	7	0	0	1	345.5	68.5	27.5	5.6	3.8	1.2	75.35	147.17	3.53
HE3	2	8	0	0	1	303.3	66	24.4	5.4	4.3	1.3	67.45	131.23	3.67
HE3	2	9	0	0	1	326.2	102.5	31.4	4.9	3.7	1.5	78.37	153.37	3.37
HE3	2	10	0	0	1	275.5	62.6	22.6	6.1	3.7	1.3	61.97	120.23	3.7
HE4		0	0	1	1	258.1	101.2	26.5	4.9	4	1.3	66	128.6	3.4
HE4	1	1	0	1	1	394	71.4	24.9	6.1	5.8	1.4	83.93	163.43	4.43
HE4	1	2	0	1	1	353.9	54.9	21.6	7.4	3.4	1.3	73.75	143.47	4.03
HE4	1	3	0	1	1	400.2	74.6	30.9	7.4	3.5	1.4	86.33	168.57	4.1
HE4	1	4	0	1	1	537.9	90.9	24.5	5.1	4.2	1.1	110.62	217.77	3.47
HE4	1	5	0	1	1	386.6	68.2	27	5.6	3.4	1.7	82.08	160.6	3.57
HE4	2	6	0	1	1	366	90.9	29.4	6.6	3.9	1.4	83.03	162.1	3.97
HE4	2	7	0	1	1	362.8	67.8	26.3	5.1	3.3	1.2	77.75	152.3	3.2
HE4	2	8	0	1	1	297.8	75.3	23.9	5.5	3.7	1.3	67.92	132.33	3.5
HE4	2	9	0	1	1	446.3	70.5	27.7	7.1	3.8	1.3	92.78	181.5	4.07
HE4	2	10	0	1	1	494.4	70	20	5.5	3.8	1.4	99.18	194.8	3.57
HE5		0	1	1	1	395.4	94.2	22.1	6.9	4	1.3	87.32	170.57	4.07
HE5	1	1	1	1	1	270	78.5	24.2	6.4	7	1.6	64.62	124.23	5
HE5	1	2	1	1	1	364.5	90	21.6	5.8	3.7	1.5	81.18	158.7	3.67
HE5	1	3	1	1	1	265.1	42.9	24.3	5.6	3.6	1.3	57.13	110.77	3.5
HE5	1	4	1	1	1	414.5	61.1	24.2	5.8	3.9	1.3	85.13	166.6	3.67
HE5	1	5	1	1	1	350.7	72.5	29.1	6.4	3.5	1.4	77.27	150.77	3.77
HE5	2	6	1	1	1	287.9	61.2	28.3	4.5	3.3	1.3	64.42	125.8	3.03
HE5	2	7	1	1	1	383.6	62.2	23.8	6	3.2	1.6	80.07	156.53	3.6
HE5	2	8	1	1	1	364	68.9	20.1	6.4	3.5	1.5	77.4	151	3.8
HE5	2	9	1	1	1	207.5	75.5	25.8	6.9	4.3	1.4	53.57	102.93	4.2
HE5	2	10	1	1	1	382	70.3	26.9	6.4	3.8	1.3	81.78	159.73	3.83
HE6		0	1	0	1	375	79.7	21.2	5.8	4.4	1.7	81.3	158.63	3.97
HE6	1	1	1	0	1	241.4	57.3	22.8	6.6	6.4	1.3	55.97	107.17	4.77
HE6	1	2	1	0	1	353.6	74.1	28.1	6.9	4.4	2.1	78.2	151.93	4.47
HE6	1	3	1	0	1	248.5	67	25.9	5.8	3.5	1.4	58.68	113.8	3.57
HE6	1	4	1	0	1	386.6	68.9	23.9	6.4	4.5	1.5	81.97	159.8	4.13
HE6	1	5	1	0	1	311.5	58.9	22.4	7.4	3.3	1.1	67.43	130.93	3.93
HE6	2	6	1	0	1	489.9	93.3	31.9	6.9	3.5	1.4	104.48	205.03	3.93
HE6	2	7	1	0	1	339.3	95.2	29.9	6.2	4.4	1.4	79.4	154.8	4
HE6	2	8	1	0	1	435.8	85.2	29.4	5.5	3.8	1.1	93.47	183.47	3.47
HE6	2	9	1	0	1	208	89.6	20.7	7	4.1	1.5	55.15	106.1	4.2
HE6	2	10	1	0	1	310.4	77.8	29.2	6	4.1	1.3	71.47	139.13	3.8
HE7		0	1	0	0	393.7	70.9	25.3	6.3	3.7	1.5	83.57	163.3	3.83
HE7	1	1	1	0	0	318.7	72.2	25.2	6.6	41.5	1.3	77.58	138.7	16.47
HE7	1	2	1	0	0	212.9	74.2	22.7	5.7	3.9	1.3	53.45	103.27	3.63
HE7	1	3	1	0	0	345.9	52.2	22.9	6.8	3.6	1.3	72.12	140.33	3.9
HE7	1	4	1	0	0	519.2	115.4	26.1	5.3	4.5	1.2	111.95	220.23	3.67
HE7	1	5	1	0	0	320.5	54.2	23.8	7.6	4	1.3	68.57	132.83	4.3
HE7	2	6	1	0	0	297.9	77.6	27.1	5.9	4	1.5	69	134.2	3.8
HE7	2	7	1	0	0	421.2	70.1	24.6	6	3.3	1.3	87.75	171.97	3.53
HE7	2	8	1	0	0	271.5	74.7	16.4	6.3	3.4	1.4	62.28	120.87	3.7
HE7	2	9	1	0	0	336.9	91.6	23.5	6	3.8	1.3	77.18	150.67	3.7
HE7	2	10	1	0	0	381.9	86.8	23.8	4.4	4.4	1.3	83.77	164.17	3.37
HE8		0	1	1	0	280.8	76.7	26.8	7.8	3.8	1.2	66.18	128.1	4.27
HE8	1	1	1	1	0	439.2	100.4	23.8	6.6	51.1	1.3	103.73	187.8	19.67
HE8	1	2	1	1	0	371.8	84.2	29.2	7.3	4.4	1.4	83.05	161.73	4.37
HE8	1	3	1	1	0	393.7	83.5	23.6	6.8	3.2	1.2	85.33	166.93	3.73
HE8	1	4	1	1	0	460.1	77	25.6	6.6	3.1	1.3	95.62	187.57	3.67
HE8	1	5	1	1	0	272.6	73.2	22.4	5.8	3.6	1.4	63.17	122.73	3.6
HE8	2	6	1	1	0	248.7	48.8	25.6	5.8	3	1.5	55.57	107.7	3.43
HE8	2	7	1	1	0	266	57.6	24.2	6.7	3.6	1.2	59.88	115.93	3.83
HE8	2	8	1	1	0	244	66.2	30.4	6.7	4	1.1	58.73	113.53	3.93
HE8	2	9	1	1	0	240.3	82.8	26.3	5.7	3.9	1.3	60.05	116.47	3.63
HE8	2	10	1	1	0	287.3	55.2	20.9	7	3.6	1.1	62.52	121.13	3.9
HE9		0	0	1	0	460.1	202.4	31.5	7.8	3.8	1.3	117.82	231.33	4.3
HE9	1	1	0	1	0	310.6	74.5	26.3	7.7	4.2	1.3	70.77	137.13	4.4
HE9	1	2	0	1	0	441.2	96.3	29.4	5.9	3.7	1.3	96.3	188.97	3.63
HE9	1	3	0	1	0	339.8	96.7	29.9	6.1	4.6	1.3	79.73	155.47	4
HE9	1	4	0	1	0	277.1	85.1	28.1	7	4.1	1.7	67.18	130.1	4.27
HE9	1	5	0	1	0	431.7	80.8	26	4.5	3.9	1.3	91.37	179.5	3.23
HE9	2	6	0	1	0	423.5	92.1	27.3	6.1	4.2	1.5	92.45	180.97	3.93
HE9	2	7	0	1	0	263.4	52.9	30.9	7.7	4	1.3	60.03	115.73	4.33
HE9	2	8	0	1	0	318.9	132.5	25.8	5.4	4	1.5	81.35	159.07	3.63
HE9	2	9	0	1	0	340	113.1	30.8	8	4.8	1.9	83.1	161.3	4.9
HE9	2	10	0	1	0	254.1	81.4	28.7	8	4.1	1.4	62.95	121.4	4.5
HE10		0	0	0	0	270.6	105.3	33.9	5.2	4	1.6	70.1	136.6	3.6
HE10	1	1	0	0	0	520.7	198.8	55.7	13.5	8.3	2.8	133.3	258.4	8.2
HE10	1	2	0	0	0	468.6	141.2	113	45.8	47.8	16.2	138.77	240.93	36.6
HE10	1	3	0	0	0	341.9	275.1	54	10.6	7.7	2.1	115.23	223.67	6.8
HE10	1	4	0	0	0	395	88.8	29.3	5.9	4.8	1.2	87.5	171.03	3.97
HE10	1	5	0	0	0	534.9	101.6	30.5	5.9	4.1	1.7	113.12	222.33	3.9
HE10	2	6	0	0	0	415.9	90.4	25	5.8	3.9	1.3	90.38	177.1	3.67
HE10	2	7	0	0	0	437.2	71.1	20.5	6.4	4.3	1.4	90.15	176.27	4.03
HE10	2	8	0	0	0	388.9	105.8	25.5	6.4	4.3	1.5	88.73	173.4	4.07
HE10	2	9	0	0	0	402.6	100.9	33.2	6.7	4.2	1.4	91.5	178.9	4.1
HE10	2	10	0	0	0	268.1	95	23.8	7.3	4	1.5	66.62	128.97	4.27
HE11		0	0	0	1	258.6	88.3	30.7	7.4	3.8	1.2	65	125.87	4.13
HE11	1	1	0	0	1	320.8	104.1	30.9	7.1	3.8	1.8	78.08	151.93	4.23
HE11	1	2	0	0	1	413.5	73.7	28.4	6.4	3.2	1.4	87.77	171.87	3.67
HE11	1	3	0	0	1	303.7	67.3	22.1	5.7	4.2	1.5	67.42	131.03	3.8
HE11	1	4	0	0	1	313.8	61.8	19.5	5.7	3.7	1.4	67.65	131.7	3.6
HE11	1	5	0	0	1	272.9	135.6	42.3	7.6	4.8	2.2	77.57	150.27	4.87
HE11	2	6	0	0	1	367.8	61.4	25.3	6.8	3.7	1.6	77.77	151.5	4.03
HE11	2	7	0	0	1	361.1	75.1	29	7.7	3.3	1.4	79.6	155.07	4.13
HE11	2	8	0	0	1	263.6	86.9	28.5	6.9	3.7	1.2	65.13	126.33	3.93
HE11	2	9	0	0	1	348.8	61.7	21.1	6.1	3.6	1.5	73.8	143.87	3.73
HE11	2	10	0	0	1	295.5	66.1	25.1	5.9	4.3	1.2	66.35	128.9	3.8
HE12		0	0	1	1	446.9	57.5	21.8	6.3	3.9	1.2	89.6	175.4	3.8
HE12	1	1	0	1	1	243.9	64	24.1	5.5	4.6	1.5	57.27	110.67	3.87
HE12	1	2	0	1	1	330.2	75.6	23	6.1	3.6	1.4	73.32	142.93	3.7
HE12	1	3	0	1	1	319.9	62.4	25.9	7.4	4.1	1.5	70.2	136.07	4.33
HE12	1	4	0	1	1	308.9	67.5	22.6	5.9	4.1	1.2	68.37	133	3.73
HE12	1	5	0	1	1	271.1	81.5	24.3	6.5	3.7	1.4	64.75	125.63	3.87
HE12	2	6	0	1	1	432.5	67.9	30.6	7.8	5.1	1.6	90.92	177	4.83
HE12	2	7	0	1	1	544.3	65.5	25.4	7.7	4.1	1.4	108.07	211.73	4.4
HE12	2	8	0	1	1	323.8	82.2	29	6.3	4.4	1.6	74.55	145	4.1
HE12	2	9	0	1	1	432.8	85.9	62.3	43.1	61	54.2	123.22	193.67	52.77
HE12	2	10	0	1	1	343	66.1	32.9	12.1	14.5	10.5	79.85	147.33	12.37
HE13		0	1	1	1	238.9	60.5	23.4	6.2	3.6	1.4	55.67	107.6	3.73
HE13	1	1	1	1	1	197.7	83.4	17.7	5.8	4.6	1.1	51.72	99.6	3.83
HE13	1	2	1	1	1	427.7	74.9	24.7	6.1	4.1	1.4	89.82	175.77	3.87
HE13	1	3	1	1	1	238.5	73.2	22.8	6.2	4.4	1.7	57.8	111.5	4.1
HE13	1	4	1	1	1	337.1	47.7	29	8.5	4.2	1.6	71.35	137.93	4.77
HE13	1	5	1	1	1	406.2	67.2	28.6	6	4.2	1.6	85.63	167.33	3.93
HE13	2	6	1	1	1	270.4	50.6	32.9	7.2	4.5	1.5	61.18	117.97	4.4
HE13	2	7	1	1	1	381.8	101.1	25.6	6.6	3.8	1.6	86.75	169.5	4
HE13	2	8	1	1	1	381.7	55.1	26.2	7.1	4.1	1.6	79.3	154.33	4.27
HE13	2	9	1	1	1	414.1	131.4	173.3	142.7	214.1	192.7	211.38	239.6	183.17
HE13	2	10	1	1	1	340.1	76	26.5	6.1	5	1.7	75.9	147.53	4.27
HE14		0	1	0	1	295.3	68.7	25.9	6	4.7	1.4	67	129.97	4.03
HE14	1	1	1	0	1	323.9	67	27.8	6.8	4.2	1.5	71.87	139.57	4.17
HE14	1	2	1	0	1	301.9	96.7	27.4	6.8	4.3	1.4	73.08	142	4.17
HE14	1	3	1	0	1	327.8	112	22.2	5.8	3.5	1.5	78.8	154	3.6
HE14	1	4	1	0	1	266.5	97.7	29.2	6.9	4.1	1.5	67.65	131.13	4.17
HE14	1	5	1	0	1	389.9	86.9	27.3	7.9	4.4	1.5	86.32	168.03	4.6
HE14	2	6	1	0	1	338.3	55.5	26.1	6.9	3.2	1.4	71.9	139.97	3.83
HE14	2	7	1	0	1	348.4	80.7	22.3	6.6	3.6	1.6	77.2	150.47	3.93
HE14	2	8	1	0	1	332.9	70.6	30.4	7.2	3.3	1.4	74.3	144.63	3.97
HE14	2	9	1	0	1	330	89.6	45.8	28.5	44.1	32.5	95.08	155.13	35.03
HE14	2	10	1	0	1	291.4	120.7	100.5	64.1	91.6	74.9	123.87	170.87	76.87
HE15		0	1	0	0	266.8	82.3	23.6	6	4.6	1.4	64.12	124.23	4
HE15	1	1	1	0	0	360	59.1	26	6.9	3.4	1.7	76.18	148.37	4
HE15	1	2	1	0	0	289.3	84.8	30.3	6.5	3.3	1.4	69.27	134.8	3.73
HE15	1	3	1	0	0	477.7	75.4	21.9	5.5	4.4	1.5	97.73	191.67	3.8
HE15	1	4	1	0	0	387.8	94.6	20.6	5.9	3.1	1.5	85.58	167.67	3.5
HE15	1	5	1	0	0	302	75.1	21.5	6.9	4	1.5	68.5	132.87	4.13
HE15	2	6	1	0	0	324.2	85.2	29.8	6	4.9	1.4	75.25	146.4	4.1
HE15	2	7	1	0	0	197.6	71.2	23.7	7.3	4.1	1.5	50.9	97.5	4.3
HE15	2	8	1	0	0	313.5	80.1	25.9	5.9	3.4	1.5	71.72	139.83	3.6
HE15	2	9	1	0	0	271.1	93.6	57.7	38.4	53.2	44.2	93.03	140.8	45.27
HE15	2	10	1	0	0	278.3	67	36.3	14.9	19.1	13.9	71.58	127.2	15.97
HE16		0	1	1	0	317.8	61.8	18.5	5.1	4	1.2	68.07	132.7	3.43
HE16	1	1	1	1	0	427.6	75.1	26.1	5.9	3.9	1.6	90.03	176.27	3.8
HE16	1	2	1	1	0	313.5	74.9	26.8	5.7	4	1.4	71.05	138.4	3.7
HE16	1	3	1	1	0	304.7	78	27.1	6.6	4.5	1.9	70.47	136.6	4.33
HE16	1	4	1	1	0	316.1	83.5	39	6.7	3	1.5	74.97	146.2	3.73
HE16	1	5	1	1	0	338.4	62.2	28.7	7.8	4.2	1.5	73.8	143.1	4.5
HE16	2	6	1	1	0	377	95.2	26.9	6.4	4.1	1.4	85.17	166.37	3.97
HE16	2	7	1	1	0	210.4	79.3	29.2	6.9	3.6	1.3	55.12	106.3	3.93
HE16	2	8	1	1	0	312.1	81.7	29.9	6.8	4.4	1.6	72.75	141.23	4.27
HE16	2	9	1	1	0	409.2	210.2	242.2	199.4	314.9	256.6	272.08	287.2	256.97
HE16	2	10	1	1	0	400.4	77.9	26.5	6.3	4.5	1.6	86.2	168.27	4.13
HE17		0	0	1	0	382.7	80.9	27.1	6	3.3	1	83.5	163.57	3.43
HE17	1	1	0	1	0	237	80.2	26.5	5.6	3.8	1.3	59.07	114.57	3.57
HE17	1	2	0	1	0	313.4	65.4	36.8	6.4	2.5	1	70.92	138.53	3.3
HE17	1	3	0	1	0	382.4	65.2	25.5	8.4	3.3	1.4	81.03	157.7	4.37
HE17	1	4	0	1	0	379.3	78.9	30.9	6	2.7	1.2	83.17	163.03	3.3
HE17	1	5	0	1	0	281.1	75.2	30.1	7.1	3.5	1.4	66.4	128.8	4
HE17	2	6	0	1	0	283.4	58.2	34.6	4.5	3.7	1.3	64.28	125.4	3.17
HE17	2	7	0	1	0	415.8	78.4	64.2	10.8	6.3	2	96.25	186.13	6.37
HE17	2	8	0	1	0	354.5	72	34.9	6.6	3.3	1.3	78.77	153.8	3.73
HE17	2	9	0	1	0	385.7	84.7	32.9	5.8	3.3	1.1	85.58	167.77	3.4
HE17	2	10	0	1	0	375.6	53.5	27.5	5.3	3.4	1.3	77.77	152.2	3.33
HE18		0	0	0	0	436.9	88.7	31.7	7.9	3.8	1.2	95.03	185.77	4.3
HE18	1	1	0	0	0	297.5	60	30.4	9.2	8.2	4.5	68.3	129.3	7.3
HE18	1	2	0	0	0	290.2	58.9	32.8	6.3	3.7	1.3	65.53	127.3	3.77
HE18	1	3	0	0	0	366.8	78.6	35.1	6	4.1	1.2	81.97	160.17	3.77
HE18	1	4	0	0	0	384.4	87.8	30.2	6	3.6	1.1	85.52	167.47	3.57
HE18	1	5	0	0	0	548.5	88.5	41.1	14.2	7.8	2.1	117.03	226.03	8.03
HE18	2	6	0	0	0	282.1	66.4	31.4	6.8	3.9	1.2	65.3	126.63	3.97
HE18	2	7	0	0	0	269.6	67.6	31	6.1	3.5	1.1	63.15	122.73	3.57
HE18	2	8	0	0	0	353	80.6	30.2	6.2	3.5	1.2	79.12	154.6	3.63
HE18	2	9	0	0	0	289	86.2	30.1	5.1	5.1	1.6	69.52	135.1	3.93
HE18	2	10	0	0	0	278.1	71.4	25.1	4	3.3	1.1	63.83	124.87	2.8
HE19		0	0	0	1	254.8	102.4	28.2	8.2	3.2	1.3	66.35	128.47	4.23
HE19	1	1	0	0	1	309.7	75.9	33	5.7	5.5	1.2	71.83	139.53	4.13
HE19	1	2	0	0	1	259.8	80.1	33.9	6.1	4.3	1.5	64.28	124.6	3.97
HE19	1	3	0	0	1	365.2	46	34.5	6.5	3.7	1.2	76.18	148.57	3.8
HE19	1	4	0	0	1	366.9	70.6	25.7	5	3.5	1.3	78.83	154.4	3.27
HE19	1	5	0	0	1	225	80.3	24.9	7.5	3.4	1.4	57.08	110.07	4.1
HE19	2	6	0	0	1	315	62.1	31.2	5.2	3.8	1.2	69.75	136.1	3.4
HE19	2	7	0	0	1	519.1	78.1	27.7	6.5	3.4	1.3	106.02	208.3	3.73
HE19	2	8	0	0	1	274.8	63.1	29.8	6.3	4.1	1	63.18	122.57	3.8
HE19	2	9	0	0	1	405.8	55.5	35.9	7.4	4.1	1.3	85	165.73	4.27
HE19	2	10	0	0	1	386.6	59.8	23.5	6.3	3.6	1.4	80.2	156.63	3.77
HE20		0	0	1	1	621.2	71.9	38.9	8.6	6.5	3.5	125.1	244	6.2
HE20	1	1	0	1	1	375.6	103.9	47.6	15.2	5.4	1.8	91.58	175.7	7.47
HE20	1	2	0	1	1	345.5	58.5	27.2	5.6	4	1.5	73.72	143.73	3.7
HE20	1	3	0	1	1	388.5	76.2	30.1	5.7	3.9	1.2	84.27	164.93	3.6
HE20	1	4	0	1	1	179.2	60.5	28.9	5.7	3.8	1.3	46.57	89.53	3.6
HE20	1	5	0	1	1	376.3	76.8	36.6	8.3	4.1	1	83.85	163.23	4.47
HE20	2	6	0	1	1	424.5	70.4	36.7	5.3	3.9	1	90.3	177.2	3.4
HE20	2	7	0	1	1	301.4	88.5	28.6	4.9	3.3	1.1	71.3	139.5	3.1
HE20	2	8	0	1	1	342.5	56.2	28.9	6.5	3.7	1.3	73.18	142.53	3.83
HE20	2	9	0	1	1	260.1	78	28.3	5	4.8	1.7	62.98	122.13	3.83
HE20	2	10	0	1	1	442.4	78.6	27.5	6.3	4.1	1.3	93.37	182.83	3.9
HE21		0	1	1	1	384.1	135.5	56.9	11.6	5.4	5.2	99.78	192.17	7.4
HE21	1	1	1	1	1	288	113.2	46.1	10.1	10.2	2.8	78.4	149.1	7.7
HE21	1	2	1	1	1	223.2	70.6	27.8	5.9	4.7	1.3	55.58	107.2	3.97
HE21	1	3	1	1	1	354.8	76.4	32.1	5.3	3.5	1	78.85	154.43	3.27
HE21	1	4	1	1	1	309.6	54.7	35	6.3	4.1	1.2	68.48	133.1	3.87
HE21	1	5	1	1	1	561.2	123.9	60.8	12.9	13.2	3.4	129.23	248.63	9.83
HE21	2	6	1	1	1	347.6	59.5	37	6	3.7	1.2	75.83	148.03	3.63
HE21	2	7	1	1	1	231.3	113.3	126.4	87	191.3	300.3	174.93	157	192.87
HE21	2	8	1	1	1	321.9	79.4	31.3	6.2	4.3	1.5	74.1	144.2	4
HE21	2	9	1	1	1	388.8	63.7	30.9	8.3	4.5	1.4	82.93	161.13	4.73
HE21	2	10	1	1	1	396.8	69.1	40.4	8	5.1	1.8	86.87	168.77	4.97
HE22		0	1	0	1	375	44.3	23.6	6.9	3.5	1.1	75.73	147.63	3.83
HE22	1	1	1	0	1	395.1	118.8	40.8	10.7	9.9	4.5	96.63	184.9	8.37
HE22	1	2	1	0	1	284.8	73.3	27.4	7.4	3.1	1.3	66.22	128.5	3.93
HE22	1	3	1	0	1	337.7	67.8	32	6	4.4	1.5	74.9	145.83	3.97
HE22	1	4	1	0	1	489.9	64.9	29.1	5.8	4.7	1.7	99.35	194.63	4.07
HE22	1	5	1	0	1	380.3	84.8	29.9	8.4	4.8	2.2	85.07	165	5.13
HE22	2	6	1	0	1	560.9	70.3	30	8.2	4	1.3	112.45	220.4	4.5
HE22	2	7	1	0	1	356.4	102.6	28.7	6.7	5	1.4	83.47	162.57	4.37
HE22	2	8	1	0	1	203.2	54.2	27.7	6.8	4.2	1.5	49.6	95.03	4.17
HE22	2	9	1	0	1	380.5	78.9	24.5	7.2	3.6	1.3	82.67	161.3	4.03
HE22	2	10	1	0	1	207.9	86.1	31.3	6.1	4.3	1.5	56.2	108.43	3.97
HE23		0	1	0	0	465.4	60.8	22.6	9.2	4.5	1	93.92	182.93	4.9
HE23	1	1	1	0	0	408.4	69.6	27.8	7.2	3.7	1.5	86.37	168.6	4.13
HE23	1	2	1	0	0	437	73.8	31.9	7.2	3.8	1.6	92.55	180.9	4.2
HE23	1	3	1	0	0	296.9	82.6	28.4	6.5	4.3	1.5	70.03	135.97	4.1
HE23	1	4	1	0	0	438.7	120.2	51.8	11.9	8.8	5.9	106.22	203.57	8.87
HE23	1	5	1	0	0	415.4	73.8	26.2	5.3	5.3	1.4	87.9	171.8	4
HE23	2	6	1	0	0	330.4	103.8	34.5	8.4	5.4	1.9	80.73	156.23	5.23
HE23	2	7	1	0	0	366.1	96.7	46.6	16.9	20.8	27.2	95.72	169.8	21.63
HE23	2	8	1	0	0	284.2	84.2	24	6.1	3.7	1.2	67.23	130.8	3.67
HE23	2	9	1	0	0	321	81.5	26.4	6.3	3.6	1.5	73.38	142.97	3.8
HE23	2	10	1	0	0	222.2	62.3	29.2	6	3.4	1.3	54.07	104.57	3.57
HE24		0	1	1	0	181	76.8	48	10.9	7.3	3.2	54.53	101.93	7.13
HE24	1	1	1	1	0	361.4	68.2	31.3	8.8	4.6	1.7	79.33	153.63	5.03
HE24	1	2	1	1	0	379.6	73.7	28.5	6.8	4.7	1.6	82.48	160.6	4.37
HE24	1	3	1	1	0	370.5	65.1	28.1	7.5	3.9	1.4	79.42	154.57	4.27
HE24	1	4	1	1	0	470.8	154.3	63.2	14.9	5.2	1.8	118.37	229.43	7.3
HE24	1	5	1	1	0	514.4	64.5	22.6	6.7	3.9	1.4	102.25	200.5	4
HE24	2	6	1	1	0	306	95.4	33.6	7.3	4.2	1.6	74.68	145	4.37
HE24	2	7	1	1	0	427.6	95.3	22.8	5.8	4.1	1.2	92.8	181.9	3.7
HE24	2	8	1	1	0	276.2	77.5	31.3	7.4	4.4	1.5	66.38	128.33	4.43
HE24	2	9	1	1	0	251.3	85.9	28.2	7.1	4.1	1.7	63.05	121.8	4.3
HE24	2	10	1	1	0	265.7	77.7	26	7.7	4.2	1.5	63.8	123.13	4.47
HE25		0	0	1	0	363.8	119.4	41.3	11.6	12.6	6.3	92.5	174.83	10.17
HE25	1	1	0	1	0	321.4	97.6	28.3	5.4	45.8	1.2	83.28	149.1	17.47
HE25	1	2	0	1	0	219.3	74.5	28.3	5.2	9.4	1.5	56.37	107.37	5.37
HE25	1	3	0	1	0	281.1	57.4	27.1	6.5	3.6	1.2	62.82	121.87	3.77
HE25	1	4	0	1	0	446.5	102	21.5	6.5	3.7	1.1	96.88	190	3.77
HE25	1	5	0	1	0	264.9	80.4	23.7	5.5	4.1	1.3	63.32	123	3.63
HE25	2	6	0	1	0	340.9	74.9	24.3	6.2	3.4	1.2	75.15	146.7	3.6
HE25	2	7	0	1	0	276.7	61.1	14.8	6.5	3.8	1.4	60.72	117.53	3.9
HE25	2	8	0	1	0	302.5	81.4	21.6	6.9	8	9.1	71.58	135.17	8
HE25	2	9	0	1	0	278.1	87.3	17.7	6.7	5.5	4	66.55	127.7	5.4
HE25	2	10	0	1	0	320.9	74.5	28.7	5.9	5.7	6.1	73.63	141.37	5.9
HE26		0	0	0	0	262.6	56.1	22.7	13.8	15.5	18.8	64.92	113.8	16.03
HE26	1	1	0	0	0	337.5	93.2	27.6	9.4	39.6	1.3	84.77	152.77	16.77
HE26	1	2	0	0	0	328.7	74.9	20.6	7.6	4.3	1.3	72.9	141.4	4.4
HE26	1	3	0	0	0	512.8	93	22.2	6.9	5.1	1.5	106.92	209.33	4.5
HE26	1	4	0	0	0	371	104.4	26.7	3.8	2.6	0.7	84.87	167.37	2.37
HE26	1	5	0	0	0	375.1	81	26	5.2	3	1.2	81.92	160.7	3.13
HE26	2	6	0	0	0	354.7	65.6	25.9	5.3	3.8	1.3	76.1	148.73	3.47
HE26	2	7	0	0	0	486.8	190.8	60.7	16.8	7.9	1.9	127.48	246.1	8.87
HE26	2	8	0	0	0	421.5	202.6	85.2	12.4	4.9	1.8	121.4	236.43	6.37
HE26	2	9	0	0	0	372.8	71.9	23.8	5.3	4.4	1.5	79.95	156.17	3.73
HE26	2	10	0	0	0	259.5	70.2	24.2	6.4	3.4	1.4	60.85	117.97	3.73
HE27		0	0	0	1	328.7	65.1	22.3	6.6	2.5	1.2	71.07	138.7	3.43
HE27	1	1	0	0	1	287	84.9	25.4	7.5	7.2	2.1	69.02	132.43	5.6
HE27	1	2	0	0	1	417.3	83.5	25.8	5.9	3.8	1.3	89.6	175.53	3.67
HE27	1	3	0	0	1	335.2	81.1	23.5	6.4	3.7	1.2	75.18	146.6	3.77
HE27	1	4	0	0	1	320.9	88	28.1	5.9	4.2	1.5	74.77	145.67	3.87
HE27	1	5	0	0	1	341.8	77.8	26	5.8	3.1	1.1	75.93	148.53	3.33
HE27	2	6	0	0	1	366.4	64.3	20.8	6.1	3.4	1.4	77.07	150.5	3.63
HE27	2	7	0	0	1	424.7	77.6	26.2	7.4	6.4	2.9	90.87	176.17	5.57
HE27	2	8	0	0	1	359.2	63.5	23.8	5.9	3.7	1.2	76.22	148.83	3.6
HE27	2	9	0	0	1	262.5	67.9	28.1	7.7	3.3	1.2	61.78	119.5	4.07
HE27	2	10	0	0	1	369.2	76.8	25.2	6.6	3.3	1.2	80.38	157.07	3.7
HE28		0	0	1	1	335.6	91.5	28.5	5.7	3.6	1.4	77.72	151.87	3.57
HE28	1	1	0	1	1	278.6	88.7	30.2	5.9	5.7	1.3	68.4	132.5	4.3
HE28	1	2	0	1	1	274.9	57.5	23.9	5	3.3	1.1	60.95	118.77	3.13
HE28	1	3	0	1	1	440.9	58.5	28.5	6.6	3.9	1.2	89.93	175.97	3.9
HE28	1	4	0	1	1	338.4	66.4	26.5	6.2	4	1.1	73.77	143.77	3.77
HE28	1	5	0	1	1	242.9	75.1	40.8	7.8	5.6	1.5	62.28	119.6	4.97
HE28	2	6	0	1	1	387.3	61.5	25.4	6.5	4.2	1.2	81.02	158.07	3.97
HE28	2	7	0	1	1	538.8	80.8	24.7	6.7	3.1	1.5	109.27	214.77	3.77
HE28	2	8	0	1	1	275.9	70.5	25.4	6.7	8.5	8.1	65.85	123.93	7.77
HE28	2	9	0	1	1	495.2	86.6	24.8	7.7	3.7	1.2	103.2	202.2	4.2
HE28	2	10	0	1	1	457.8	79.5	50.8	8.5	4.8	1.8	100.53	196.03	5.03
HE29		0	1	1	1	409	120.9	22.7	6.1	4.7	2.2	94.27	184.2	4.33
HE29	1	1	1	1	1	383.7	68.5	24.5	6.4	4.8	1.7	81.6	158.9	4.3
HE29	1	2	1	1	1	236.8	70.7	25.3	5.4	3.6	1.3	57.18	110.93	3.43
HE29	1	3	1	1	1	453.4	92	22.5	6.2	3.3	1.2	96.43	189.3	3.57
HE29	1	4	1	1	1	264.6	79.6	27.9	6.1	3.7	1.2	63.85	124.03	3.67
HE29	1	5	1	1	1	289.5	81.4	26.5	6.7	3.9	1.3	68.22	132.47	3.97
HE29	2	6	1	1	1	438.3	72.9	24.4	6	4	1.6	91.2	178.53	3.87
HE29	2	7	1	1	1	284.9	50.8	24.5	4.4	3.3	1.2	61.52	120.07	2.97
HE29	2	8	1	1	1	382.5	47.5	21.9	6	4.6	1.4	77.32	150.63	4
HE29	2	9	1	1	1	458.6	59.9	20.6	6.7	4.7	2.3	92.13	179.7	4.57
HE29	2	10	1	1	1	324.6	65	25.1	6.7	3.7	1.4	71.08	138.23	3.93
HE30		0	1	0	1	296.8	99	22.8	6.4	4.1	1.5	71.77	139.53	4
HE30	1	1	1	0	1	266.5	63.3	24.2	6.8	4	1.2	61	118	4
HE30	1	2	1	0	1	413	71.1	31.3	6.4	3.9	1.3	87.83	171.8	3.87
HE30	1	3	1	0	1	238.1	88.1	19.9	5.2	2.3	1.2	59.13	115.37	2.9
HE30	1	4	1	0	1	274.8	60.6	20.2	7.2	3.4	1.4	61.27	118.53	4
HE30	1	5	1	0	1	372.6	63.4	25.3	7	4	1.7	79	153.77	4.23
HE30	2	6	1	0	1	452.8	74.2	20.8	5.5	3.6	1.3	93.03	182.6	3.47
HE30	2	7	1	0	1	455.6	78	25.5	7	4	1.3	95.23	186.37	4.1
HE30	2	8	1	0	1	471.3	87	17.6	6.7	3.4	1.1	97.85	191.97	3.73
HE30	2	9	1	0	1	349.2	195.5	64.4	8.4	5.8	2.2	104.25	203.03	5.47
HE30	2	10	1	0	1	309.8	79.1	25.5	6.2	4.9	1.2	71.12	138.13	4.1
HE31		0	1	0	0	313.9	89.5	23.1	6.6	2.9	1.1	72.85	142.17	3.53
HE31	1	1	1	0	0	284.9	70.4	22	6.5	13.7	1.8	66.55	125.77	7.33
HE31	1	2	1	0	0	331.3	47.9	26.1	5.9	4.4	0.9	69.42	135.1	3.73
HE31	1	3	1	0	0	571.6	74.1	23.8	6.4	4.3	1.3	113.58	223.17	4
HE31	1	4	1	0	0	324.9	76	22.9	6.9	3.6	1	72.55	141.27	3.83
HE31	1	5	1	0	0	176.5	56.5	33.7	5.3	3.2	1.1	46.05	88.9	3.2
HE31	2	6	1	0	0	276.4	73.9	18.5	6	3.2	1.2	63.2	122.93	3.47
HE31	2	7	1	0	0	275.9	52.3	27.8	5.9	3.6	1.3	61.13	118.67	3.6
HE31	2	8	1	0	0	223.5	84.5	26	5.8	2.9	1.4	57.35	111.33	3.37
HE31	2	9	1	0	0	314.5	94.5	27.4	7.1	8.6	1.7	75.63	145.47	5.8
HE31	2	10	1	0	0	339.7	59.9	30	4.3	3.4	1.3	73.1	143.2	3
HE32		0	1	1	0	321.7	57.2	29.5	4.7	3.5	1.7	69.72	136.13	3.3
HE32	1	1	1	1	0	355.3	88.3	25.6	7.4	17.2	1.5	82.55	156.4	8.7
HE32	1	2	1	1	0	258.5	66.2	21.7	7.4	4.4	1.3	59.92	115.47	4.37
HE32	1	3	1	1	0	286.9	60.8	26.1	6.3	3.9	1.4	64.23	124.6	3.87
HE32	1	4	1	1	0	207.6	60.7	22.3	6.4	3.6	1	50.27	96.87	3.67
HE32	1	5	1	1	0	405.9	77.8	24.3	6.6	3.6	1.3	86.58	169.33	3.83
HE32	2	6	1	1	0	463.7	55	22	7.9	3	0.9	92.08	180.23	3.93
HE32	2	7	1	1	0	288.6	60	21.7	5.4	3.5	1.4	63.43	123.43	3.43
HE32	2	8	1	1	0	454.3	60.9	21.9	5.9	3.7	1.2	91.32	179.03	3.6
HE32	2	9	1	1	0	335.5	89.1	29.2	7.7	4.8	2.6	78.15	151.27	5.03
HE32	2	10	1	1	0	345.7	100.4	25	5.6	6	5	81.28	157.03	5.53
HE33		0	0	1	0	404.2	74.4	26.4	7.3	4.4	1.3	86.33	168.33	4.33
HE33	1	1	0	1	0	369.2	65.4	29	7	7	1.6	79.87	154.53	5.2
HE33	1	2	0	1	0	228.4	67.7	23.5	5.8	4.8	1.5	55.28	106.53	4.03
HE33	1	3	0	1	0	400.7	59.5	25.4	6.6	4.1	1.6	82.98	161.87	4.1
HE33	1	4	0	1	0	350.9	92.7	35.9	4.2	3.5	1.4	81.43	159.83	3.03
HE33	1	5	0	1	0	212.5	65.2	25.9	7.3	4.8	1.6	52.88	101.2	4.57
HE33	2	6	0	1	0	362.3	57.1	23.3	7.8	4.2	1.5	76.03	147.57	4.5
HE33	2	7	0	1	0	474.1	57.2	31.7	6.4	3.7	1.3	95.73	187.67	3.8
HE33	2	8	0	1	0	337.1	72.8	25.9	5.4	4	1.5	74.45	145.27	3.63
HE33	2	9	0	1	0	294.4	87	33	5	4.6	1.3	70.88	138.13	3.63
HE33	2	10	0	1	0	290.3	74.3	19.4	8.5	3.5	1.5	66.25	128	4.5
HE34		0	0	0	0	357	72.3	22.5	5.7	4.1	1.3	77.15	150.6	3.7
HE34	1	1	0	0	0	298.5	77.2	20.1	6.7	4.9	1.2	68.1	131.93	4.27
HE34	1	2	0	0	0	308.8	51.2	25.7	4.2	4.4	1.5	65.97	128.57	3.37
HE34	1	3	0	0	0	238.5	76.1	24.5	7.1	3.4	1.3	58.48	113.03	3.93
HE34	1	4	0	0	0	289.1	45.5	24.9	6.6	4	1.4	61.92	119.83	4
HE34	1	5	0	0	0	302	59.1	24	6.4	3.4	1.5	66.07	128.37	3.77
HE34	2	6	0	0	0	390.7	99.4	29.5	6.9	3.9	1.3	88.62	173.2	4.03
HE34	2	7	0	0	0	299.1	64.8	22.6	6.1	4.2	1.2	66.33	128.83	3.83
HE34	2	8	0	0	0	316.7	101.1	22.4	4.8	3.5	1.6	75.02	146.73	3.3
HE34	2	9	0	0	0	387.7	69.3	23.6	6.2	4.8	1	82.1	160.2	4
HE34	2	10	0	0	0	404.9	81.1	30.1	7.2	4.2	1.6	88.18	172.03	4.33
HE35		0	0	0	1	236	63.8	29.3	5.8	4.5	1.7	56.85	109.7	4
HE35	1	1	0	0	1	375.2	110.9	27.5	7.5	3.6	1.5	87.7	171.2	4.2
HE35	1	2	0	0	1	386.2	73	21	6.3	3.5	1.4	81.9	160.07	3.73
HE35	1	3	0	0	1	329.4	58.8	29	5.9	4.8	1.2	71.52	139.07	3.97
HE35	1	4	0	0	1	402.1	81.6	24.6	5.8	3.9	1.2	86.53	169.43	3.63
HE35	1	5	0	0	1	266.4	66.9	25.2	5.6	3.6	1.3	61.5	119.5	3.5
HE35	2	6	0	0	1	654.8	84	18.9	4.9	3.7	1.1	127.9	252.57	3.23
HE35	2	7	0	0	1	309.7	62	21.5	6.1	3.8	1.6	67.45	131.07	3.83
HE35	2	8	0	0	1	377.5	63.2	22.6	5.7	3.9	1.4	79.05	154.43	3.67
HE35	2	9	0	0	1	318.9	73.8	22.9	7.3	3.3	1.4	71.27	138.53	4
HE35	2	10	0	0	1	269	65.7	25	5.8	3.7	1.3	61.75	119.9	3.6
HE36		0	0	1	1	363.9	55.2	24.4	4.2	3.4	1.6	75.45	147.83	3.07
HE36	1	1	0	1	1	259.6	77.8	20.9	6	4	1.3	61.6	119.43	3.77
HE36	1	2	0	1	1	361.4	136.8	28.2	6.4	4.4	1.4	89.77	175.47	4.07
HE36	1	3	0	1	1	233.3	83	28.6	6.4	4.7	1.6	59.6	114.97	4.23
HE36	1	4	0	1	1	483.3	78.7	30.3	4.9	3.6	1.4	100.37	197.43	3.3
HE36	1	5	0	1	1	323.9	83.9	22.5	7	3.6	1.3	73.7	143.43	3.97
HE36	2	6	0	1	1	296.1	93.8	26.7	6.9	4	1.2	71.45	138.87	4.03
HE36	2	7	0	1	1	245.8	88.5	28.5	6.3	4.2	1.4	62.45	120.93	3.97
HE36	2	8	0	1	1	475.5	70.3	22.5	6.4	3.7	1.2	96.6	189.43	3.77
HE36	2	9	0	1	1	385.6	89.4	26.2	6.8	3.4	1.5	85.48	167.07	3.9
HE36	2	10	0	1	1	367.3	88.1	26.2	6.2	3.9	1.3	82.17	160.53	3.8
HE37		0	1	1	1	438	58.7	27	7.2	3.3	1.4	89.27	174.57	3.97
HE37	1	1	1	1	1	355.3	57.8	33.8	6.4	5.7	1.6	76.77	148.97	4.57
HE37	1	2	1	1	1	403	85.4	35.5	7.1	5.1	1.7	89.63	174.63	4.63
HE37	1	3	1	1	1	297.3	87.1	34.1	7.2	3.4	1.5	71.77	139.5	4.03
HE37	1	4	1	1	1	268.8	71.6	25.1	6.1	4.7	1.3	62.93	121.83	4.03
HE37	1	5	1	1	1	473.6	109.3	29	5.4	4.1	1.3	103.78	203.97	3.6
HE37	2	6	1	1	1	496.9	86.9	32.7	11.8	10.6	3	106.98	205.5	8.47
HE37	2	7	1	1	1	186	79.9	25.5	5.7	3.9	1.6	50.43	97.13	3.73
HE37	2	8	1	1	1	363.3	62.9	28.1	6.5	4.5	1.3	77.77	151.43	4.1
HE37	2	9	1	1	1	280.7	43.9	23.4	6.3	4.2	1.1	59.93	116	3.87
HE37	2	10	1	1	1	485.3	83.2	29.9	5.9	3.7	1.4	101.57	199.47	3.67
HE38		0	1	0	1	293.2	62.3	33.6	6.3	4.7	1.9	67	129.7	4.3
HE38	1	1	1	0	1	339.9	138.9	87.4	7.6	9.6	2.2	97.6	188.73	6.47
HE38	1	2	1	0	1	293.4	85.4	22.3	5.2	3.4	1.4	68.52	133.7	3.33
HE38	1	3	1	0	1	362.9	102.5	23	7.2	4.6	1.4	83.6	162.8	4.4
HE38	1	4	1	0	1	275	64.3	30	6.7	3.3	1.5	63.47	123.1	3.83
HE38	1	5	1	0	1	269.4	56.6	25.7	7.6	3.6	1.1	60.67	117.23	4.1
HE38	2	6	1	0	1	417.5	71.2	21.7	6.3	3.9	1.4	87	170.13	3.87
HE38	2	7	1	0	1	405.6	86.7	23.1	6.2	3.9	1.6	87.85	171.8	3.9
HE38	2	8	1	0	1	596.2	101.3	27.3	5.5	3.5	1.5	122.55	241.6	3.5
HE38	2	9	1	0	1	497	75.4	21.7	6.4	3.9	1.4	100.97	198.03	3.9
HE38	2	10	1	0	1	311.6	63.5	23.8	5.8	3.6	1.5	68.3	132.97	3.63
HE39		0	1	0	0	323.9	54.2	33.3	6.4	3.4	1.6	70.47	137.13	3.8
HE39	1	1	1	0	0	391.1	70.2	29	8.1	7.7	1.6	84.62	163.43	5.8
HE39	1	2	1	0	0	304	119	29.2	5.4	4.2	1.4	77.2	150.73	3.67
HE39	1	3	1	0	0	277.6	83.9	25.6	6.3	4.9	1.7	66.67	129.03	4.3
HE39	1	4	1	0	0	345	79.1	26	4.9	3.4	1.4	76.63	150.03	3.23
HE39	1	5	1	0	0	377.4	77.4	24.3	9.3	5.6	1.6	82.6	159.7	5.5
HE39	2	6	1	0	0	400.4	54.9	23.2	7	4.2	1.1	81.8	159.5	4.1
HE39	2	7	1	0	0	291.7	57.4	21.7	6.5	3.6	1.4	63.72	123.6	3.83
HE39	2	8	1	0	0	253.5	68.4	27	5.9	4.4	1.6	60.13	116.3	3.97
HE39	2	9	1	0	0	418.2	68.4	26.4	6.9	3.9	1.6	87.57	171	4.13
HE39	2	10	1	0	0	398	80.4	22.9	5.8	4.4	1.4	85.48	167.1	3.87
HE40		0	1	1	0	401.8	83.7	35.6	6.5	4.7	2.2	89.08	173.7	4.47
HE40	1	1	1	1	0	295.8	72.8	28	6.1	11	1.7	69.23	132.2	6.27
HE40	1	2	1	1	0	407.3	90.9	23.8	7	5	1.7	89.28	174	4.57
HE40	1	3	1	1	0	438.3	100.7	24.4	6.2	3.6	1.3	95.75	187.8	3.7
HE40	1	4	1	1	0	536.3	71	31.4	6	4.8	1.3	108.47	212.9	4.03
HE40	1	5	1	1	0	333	108.9	35.5	9.4	6.6	2.2	82.6	159.13	6.07
HE40	2	6	1	1	0	359.9	58.4	30.1	5.4	4	1.6	76.57	149.47	3.67
HE40	2	7	1	1	0	338.7	98.6	33.7	7	4.3	1.6	80.65	157	4.3
HE40	2	8	1	1	0	298.3	66.2	25.7	6.9	3.6	1.3	67	130.07	3.93
HE40	2	9	1	1	0	342.8	100.7	28.4	5.8	3.9	1.2	80.47	157.3	3.63
HE40	2	10	1	1	0	411.4	75.5	19.3	6.1	4.6	1.4	86.38	168.73	4.03
HE41		0	1	1	0	289.7	80.7	39	16.6	19	12.1	76.18	136.47	15.9
HE41	1	1	1	1	0	375.1	90.1	28.3	10.3	15.4	1.9	86.85	164.5	9.2
HE41	1	2	1	1	0	342.5	96.7	28.5	7.3	4.4	1.4	80.13	155.9	4.37
HE41	1	3	1	1	0	373.2	78.3	19.3	6.4	4.1	1.2	80.42	156.93	3.9
HE41	1	4	1	1	0	392.3	71.9	26.1	5.6	2.7	1.3	83.32	163.43	3.2
HE41	1	5	1	1	0	266.4	96	32.6	7	3	1	67.67	131.67	3.67
HE41	2	6	1	1	0	336.8	75.7	26.2	5.1	3.1	1.2	74.68	146.23	3.13
HE41	2	7	1	1	0	341	64.9	28.1	4.8	3.4	1	73.87	144.67	3.07
HE41	2	8	1	1	0	423.9	87.9	30.3	5.3	3.4	1.2	92	180.7	3.3
HE41	2	9	1	1	0	349.1	78.9	28.2	7.2	4.5	2.2	78.35	152.07	4.63
HE41	2	10	1	1	0	281.1	89.3	23.6	5.7	3.8	1	67.42	131.33	3.5
HE42		0	1	0	0	728.7	146.8	85.7	23.6	10.7	3	166.42	320.4	12.43
HE42	1	1	1	0	0	391.1	77.2	25.5	6.9	5.5	1.2	84.57	164.6	4.53
HE42	1	2	1	0	0	398	91.3	26.1	5.9	4.7	1.5	87.92	171.8	4.03
HE42	1	3	1	0	0	523	63.1	20.8	5.9	3.2	1	102.83	202.3	3.37
HE42	1	4	1	0	0	323.9	73.5	27.5	5.3	3.6	1.2	72.5	141.63	3.37
HE42	1	5	1	0	0	283.2	80.6	24.3	6.8	3.9	1.1	66.65	129.37	3.93
HE42	2	6	1	0	0	392.5	68.2	28.8	6.4	3.9	1.3	83.52	163.17	3.87
HE42	2	7	1	0	0	359.1	99.7	24.9	6.4	3.8	1.2	82.52	161.23	3.8
HE42	2	8	1	0	0	361.6	73.6	22.9	6.1	3.8	1.1	78.18	152.7	3.67
HE42	2	9	1	0	0	255.2	72.1	26.6	6.6	4	1.3	60.97	117.97	3.97
HE42	2	10	1	0	0	365.7	79.5	21.8	5.8	4.2	1.2	79.7	155.67	3.73
HE43		0	1	0	1	400.6	62.3	22	6.3	4.6	1.8	82.93	161.63	4.23
HE43	1	1	1	0	1	333.8	71.7	24.9	5.9	2.9	1.4	73.43	143.47	3.4
HE43	1	2	1	0	1	388.3	74.7	30	6	3.5	1.3	83.97	164.33	3.6
HE43	1	3	1	0	1	297.3	72.9	28.2	6.3	3.6	1.2	68.25	132.8	3.7
HE43	1	4	1	0	1	326.8	63.9	25	6.7	3.9	1.3	71.27	138.57	3.97
HE43	1	5	1	0	1	453.6	93.6	21.3	7.4	4	1.1	96.83	189.5	4.17
HE43	2	6	1	0	1	378.2	58	26.5	5.8	2.8	1.3	78.77	154.23	3.3
HE43	2	7	1	0	1	340.9	64	28.4	5.9	3.8	1.2	74.03	144.43	3.63
HE43	2	8	1	0	1	337.1	46	31	7.4	4.1	1.3	71.15	138.03	4.27
HE43	2	9	1	0	1	361.9	94.3	27.4	7.1	4.3	1.4	82.73	161.2	4.27
HE43	2	10	1	0	1	388.4	59.4	24.3	5.8	4	1.2	80.52	157.37	3.67
HE44		0	1	1	1	496.4	76.4	25.7	7	4.3	1.6	101.9	199.5	4.3
HE44	1	1	1	1	1	228.9	143.7	25.5	5.5	3.7	1.3	68.1	132.7	3.5
HE44	1	2	1	1	1	368.8	60.7	24.4	6.4	3.7	1.3	77.55	151.3	3.8
HE44	1	3	1	1	1	304.8	57.1	27.9	5.7	4	1.3	66.8	129.93	3.67
HE44	1	4	1	1	1	356.8	60.5	21.9	6.1	3.3	1.1	74.95	146.4	3.5
HE44	1	5	1	1	1	326.2	72.9	21.8	6.9	3.5	1.3	72.1	140.3	3.9
HE44	2	6	1	1	1	321.9	51.9	23.8	5.9	3.2	1.2	67.98	132.53	3.43
HE44	2	7	1	1	1	335.8	81.3	24.3	4.7	3.4	1.1	75.1	147.13	3.07
HE44	2	8	1	1	1	322.7	74.2	22.2	5.1	4.2	1	71.57	139.7	3.43
HE44	2	9	1	1	1	371.7	132.4	33.7	6.1	3.5	1.3	91.45	179.27	3.63
HE44	2	10	1	1	1	444.3	71	30.5	7.1	3.6	1.4	92.98	181.93	4.03
HE45		0	0	1	1	460.6	109.4	61.1	22.8	8.2	3.3	110.9	210.37	11.43
HE45	1	1	0	1	1	304.7	68.8	31	15.7	26	29.7	79.32	134.83	23.8
HE45	1	2	0	1	1	332.9	68.4	31.9	6.6	3.9	1.5	74.2	144.4	4
HE45	1	3	0	1	1	348.1	111.8	37.1	9.3	4.4	1.7	85.4	165.67	5.13
HE45	1	4	0	1	1	341.5	65.6	30	7.4	3.9	1.2	74.93	145.7	4.17
HE45	1	5	0	1	1	397	69.7	28.5	6	3.3	1.3	84.3	165.07	3.53
HE45	2	6	0	1	1	400.7	101.2	27.9	6.6	5.3	1.5	90.53	176.6	4.47
HE45	2	7	0	1	1	342.6	68.8	26	6.6	3.8	1.3	74.85	145.8	3.9
HE45	2	8	0	1	1	382.5	65.2	24.1	5.9	4.4	1.4	80.58	157.27	3.9
HE45	2	9	0	1	1	246.1	60.8	23.5	6.9	4.1	1.5	57.15	110.13	4.17
HE45	2	10	0	1	1	301.6	70.4	21.7	6.2	3.2	1.3	67.4	131.23	3.57
HE46		0	0	0	1	378.6	86.5	35.2	8.5	4	1.6	85.73	166.77	4.7
HE46	1	1	0	0	1	254.9	81.6	25.9	5.9	4.3	1.1	62.28	120.8	3.77
HE46	1	2	0	0	1	320.7	73.5	19.4	4.9	3.2	1.3	70.5	137.87	3.13
HE46	1	3	0	0	1	203.9	83.4	24	5.2	3.3	1.2	53.5	103.77	3.23
HE46	1	4	0	0	1	277	59.8	25.7	6.2	2.9	1.1	62.12	120.83	3.4
HE46	1	5	0	0	1	295.6	85.2	24.2	4.7	3.6	1.3	69.1	135	3.2
HE46	2	6	0	0	1	373.2	58.1	17.1	5.1	3	1.2	76.28	149.47	3.1
HE46	2	7	0	0	1	399	64.9	25.3	4.4	3.1	1.3	83	163.07	2.93
HE46	2	8	0	0	1	272.2	66.9	21.6	6	3.6	1.1	61.9	120.23	3.57
HE46	2	9	0	0	1	242.7	74.5	20.4	4.8	3.3	1.2	57.82	112.53	3.1
HE46	2	10	0	0	1	335.8	59.1	31.4	5.8	3.3	1.2	72.77	142.1	3.43
HE47		0	0	0	0	303.5	64.5	27.1	6	3.7	1.4	67.7	131.7	3.7
HE47	1	1	0	0	0	279.9	84.3	25.5	6.5	20	1.8	69.67	129.9	9.43
HE47	1	2	0	0	0	414.1	87.6	23.9	5	3.3	1.5	89.23	175.2	3.27
HE47	1	3	0	0	0	455	83.4	30.4	5.2	4.3	1.1	96.57	189.6	3.53
HE47	1	4	0	0	0	276.4	65.4	32.4	6.7	4.4	1.9	64.53	124.73	4.33
HE47	1	5	0	0	0	369.6	70	23.5	6.1	3	1.1	78.88	154.37	3.4
HE47	2	6	0	0	0	297.8	81	25.5	5.4	3	1.3	69	134.77	3.23
HE47	2	7	0	0	0	334.1	83.5	29.8	6	3.5	1.4	76.38	149.13	3.63
HE47	2	8	0	0	0	277.7	67.9	24.3	4.8	3.6	1.2	63.25	123.3	3.2
HE47	2	9	0	0	0	222.6	61.9	22.5	5	3.4	1.4	52.8	102.33	3.27
HE47	2	10	0	0	0	274.5	66.2	20.5	5.4	3.3	1.1	61.83	120.4	3.27
HE48		0	0	1	0	458.9	63.5	34	8.2	5.3	1.7	95.27	185.47	5.07
HE48	1	1	0	1	0	409.6	70.3	28.5	16	22.4	4.9	91.95	169.47	14.43
HE48	1	2	0	1	0	412.2	83.2	27.2	5.8	4.3	1.5	89.03	174.2	3.87
HE48	1	3	0	1	0	414.1	86.8	27.3	6.4	3.4	1.5	89.92	176.07	3.77
HE48	1	4	0	1	0	238.3	67.6	25.3	6.8	3.8	1.2	57.17	110.4	3.93
HE48	1	5	0	1	0	267.1	69.5	23.2	7.9	3.5	1.2	62.07	119.93	4.2
HE48	2	6	0	1	0	322.9	60.5	19.2	3.9	3.2	1.1	68.47	134.2	2.73
HE48	2	7	0	1	0	304.3	69.8	24.8	6.1	3.7	0.9	68.27	132.97	3.57
HE48	2	8	0	1	0	313.1	56.9	22.5	5.9	3	1	67.07	130.83	3.3
HE48	2	9	0	1	0	367.5	77	25.7	6.4	3.4	1.1	80.18	156.73	3.63
HE48	2	10	0	1	0	288.8	73.2	22.7	6	3.8	1	65.92	128.23	3.6

## Sheet: Sheet2
code
broadfreq
freq
hemisphere
position
signal
delta
theta
alpha
beta1
beta2
gamma
global
lowfreq
highfreq
